# Supplementary material for: Comparing Wild and Cultivated Food Plant Richness Between the Arid American and the Mesoamerican Centers of Diversity, as Means to Advance Indigenous Food Sovereignty in the Face of Climate Change
Source: Frontiers journal article supplement (doi:10.3389/fsufs.2022.840619), 2022-06-20
Supplement: Table_1.docx [file Table_1.docx]

**Table S1 Domesticated Plants Associated with the Arid American Center of Crop Diversity**

| Species | Common Names | Probable Domes-tication in Arid America | Probable Domes-tication in Mesoamerica | Registered in pre-Invasion Arid America | Registered in post-Invasion Arid America | Reference |  |
| --- | --- | --- | --- | --- | --- | --- | --- |
| *Agave americana* | arroqueño, maguey de pulque | X | X | X | X | Colunga-García-Marín et al. 2007& 2017; Gentry 1982 |  |
| *Agave angustifolia* | bacanora, espadín, ixtlero verde, lineño | X | X |  | X | Colunga-García-Marín et al. 2007 Gentry 1982 |  |
| *Agave delameteri* | Tonto Basin agave | X |  |  | X | Hodgson 2012 |  |
| *Agave mapisaga* | pulquero, listocillo, tarimbaro | X | X |  | X | Colunga-García-Marín et al. 2007 & 2017; Gentry 1982 |  |
| *Agave murpheyi* | Hohokam agave | X |  | X | X | Colunga-García-Marín et al. 2007; Hodgson 2012 |  |
| *Agave philippsiana* | Grand Canyon century plant | X |  | X |  | Hodgson 2012 |  |
| *Agale rhodacantha* | mexicano, yocogihua,  ixtlero amarillo | X | X |  | X | Colunga-García-Marín et al. 2007 & 2017; Gentry 1982 |  |
| *Agave salmiana* | maguey de pulque, maguey verde | X | X | X | X | Colunga-García-Marín et al. 2007 & 2017; Gentry 1982 |  |
| *Agave sanpedroensis* | San Pedro agave | X |  | X |  | Hodgson et al. 2018 |  |
| *Agave verdensis* | Sacred Mountain agave | X |  | X |  | Hodgson & Salywon 2013 |  |
| *Agave yavapaiensis* | Page Springs agave | X |  | X |  | Hodgson & Salywon 2013 |  |
| *Agave weberi* | maguey de mezcal | X |  |  | X | Colunga-García-Marín et al. 2007; Gentry 1982 |  |
| *Amaranthus cruentus* | alegría, grain amaranth, huautle | X |  | X | X | Burns et al. 2000 |  |
| *Amaranthus hypochon-driacus* | alegría, grain amaranth, huautle |  | X | X | X | Burns et al. 2000; Ford 1981 |  |
| *Canavalia ensiformis* | jack bean | X |  | X | X | Ford 1981 |  |
| *Capsicum annuum* | chile |  | X |  | X | Burns et al. 2000 |  |
| *Chenopodium berlandieri* | huauzontle |  | X | X | X | Ford 1981 |  |
| *Cucurbita argyrosperma* | calabaza de las aguas, green striped cushaw |  | X | X | X | Burns et al. 2000; Ford 1981 |  |
| *Cucurbita moschata* | segualca |  | X | X | X | Ford 1981 |  |
| *Cucurbita pepo* | calabaza, pumpkin |  | X | X | X | Ford 1981 |  |
| *Distichlis palmeri* | nypa, Palmer’s saltgrass | X |  |  | X | Yensen 2008 |  |
| *Dysphania ambrosioides* | epazote |  | X |  |  | Ford 1981; Burns et al 2000 |  |
| *Gossypium hirsutum* | algodón, cotton |  | X? | X | X | Ford 1981 |  |
| *Helianthus annuus* | girasol, sunflower | ? | ? |  | X | Ford 1981 |  |
| *Hyptis suaveolens* | cham, chía grande, conivari |  | X |  | X | Burns et al. 2000 |  |
| *Hordeum pusillum* | little barley | X? |  | X | ? | Graham et al. 2017; Ford 1981, Louder-back & Pavlik 2018 |  |
| *Jaltomata procumbens* | jaltomato | X | X |  | X | Burns et al. 2000 |  |
| *Lagenaria siceraria* | bottlegourd, bule |  | X | X | X | Ford 1981 |  |
| *Myrtillocactus geometrizans* | garambullo, blue myrtle cactus |  | X |  | X | Hernández- et al. 1991 | |
| *Opuntia durangensis* | xoconostle chivo | X |  |  | X | Griffith 2004 |  |
| *Opuntia leucotricha* | nopal duraznillo | X? | X |  | X | Griffith 2004 |  |
| *Opuntia megacantha* | large-thorned prickly pear, orange fruit prickly pear, nopal blanco, nopal picochulo | X? | X |  | X | Griffith 2004 |  |
| *Opuntia robusta* | tuna tapón, tuna Castillana | X? | X |  | X | Griffith 2004 |  |
| *Opuntia streptacantha* complex (incl. *O. ficus-indica*) | nopal de Castilla, nopal cardón, white-spined prickly pear | X? | X |  | X | Griffith 2004 |  |
| *Panicum sonorum* | sagui, Sonoran panicgrass | X |  | X | X | Burns et al. 2000 |  |
| *Phaseolus acutifolius* | teparí, tepary bean | X | X? | X | X | Ford 1981 |  |
| *Phaseolus coccineus* | ayocote, runner bean |  | X | X | X | Ford 1981 |  |
| *Phaseolus lunatus* | alubia, lima bean, sieva |  | X? | X | X | Ford 1981 |  |
| *Phaseolus vulgaris* | common bean, frijol común |  | X | X | X | Ford 1981 |  |
| *Proboscidea parviflora* | devil’s claw, torito, uña de gato | X |  |  | X | Ford 1981 |  |
| *Physalis philadelphica* | miltomate, tomatillo | X? | X | X | X | Solís-Montero et al. 2021 |  |
| *Salvia hispanica* | chía |  | X |  | X | Cahill & Provance 2002 |  |
| *Salvia tiliifolia* | Raramuri chía | X |  |  | X | Burns et al. 2000 |  |
| *Solanum jamesii* | Four Corners potato | X |  | X | X | Kinder et al. 2017; Louderback and Pavlik 2017 |  |
| *Solanum cf. nigrescens* | chichi-quelite, yerba mora | X? | X |  |  | Burns et al. 2000 |  |
| *Stenocereus griseus* | pitayo |  | X |  | X | Casas et al. 2002 |  |
| *Stenocereus marginatus* | orégano |  | X |  | X | Casas et al. 2002 |  |
| *Stenocereus pruinosus* | cuapatla, pitayo de mayo, xoconostle |  |  |  |  | Casas et al. 2002 |  |
| *Stenocereus stellatus* | jonocostle,  pitaya de agosto |  |  |  |  | Casas et al. 1999; Casas et al. 2002 |  |
| *Zea mays* | maíz |  | X |  | X | Ford 1981 |  |

**References:**

Burns, B. T., Drees, M., Nabhan, G. P., and Nelson, S. C. (2000). “Crop diversity among Indigenous farming cultures in the tropical deciduous forest”, in The Tropical Deciduous Forest of Alamos: Biodiversity in a Threatened Ecosystem in Mexico, edited by R. Robichaux. Tucson AZ, University of Arizona Press. p. 152–171.

Cahill, J. P., and Provance, M. C. (2002). Genetics of qualitative traits in domesticated chia (*Salvia hispanica* L.). *Journal of Heredity*, *93* (1), 52-55.

Casas, A., Caballero, J., and Valiente-Banuet, A. (1999). Use, management, and domestication of columnar cacti in south-central Mexico: a historical perspective. J. Ethnobiol. 19, 71–95.

Casas, A., Valiente-Banuet, A., and Caballero, J. (2002). “Evolutionary trends in columnar cacti under domestication in south-central México”, in Columnar Cacti and their Mutualists. Edited by T.J. Fleming TJ. and A. Valiente-Banuet. Tucson, AZ: University of Arizona Press. p. 137–164. doi: 10.2307/j.ctv23khmrw.12

Colunga-GarcíaMarín, P., Torres-García, I., Casas, A., Figueredo, C. J., Rangel-Landa, S., Delgado, A. , Vargas, O., Cabrera-Toledo, D., Aguirre-Dugua, X., Eguiarte, L., Zizumbo-Villarreal, D., and Carrillo-Galván, G. (2017). “Los agaves y las prácticas Mesoamericanas de aprovechamiento, manejo y domesticación”, in Domesticación en el Continente Americano. Investigación para el manejo sustentable de recursos genéticos en el Nuevo Mundo, edited by Casas A, Torres-Guevara J, Parra F. Lima, Perú: Universidad Nacional Autónoma de México, Universidad Nacional Agraria La Molina del Perú. Vol 2. p. 273–310.

Colunga-GarcíaMarín, P., Zizumbo-Villarreal, D., and Martínez-Torres, J. (2007). “Tradiciones en el aprovechamiento de los agaves mexicanos: una aportación a la protección legal y conservación de su diversidad biológica y cultural”, in En lo Ancestral hay Futuro: del Tequila, los Mezcales y Otros Agaves, edited by P. Colunga-GarcíaMarín, Larqué Saavedra A., Eguiarte L., and Zizumbo-Villarreal, D. Mérida, YUC. México: CICY-CONACYT-CONABIO-INE. p. 229–248.

Ford, R. I. (1991). Gardening and farming before 1000. A.D.: Patterns of prehistoric cultivation north of México. J. Ethnobiol. 1, 6–27.

Gentry, H. S. (1982). Agaves of Continental North America. Tucson AZ: University of Arizona Press. doi: 10.2307/j.ctv1t4m2h4

Graham, A.F., K. R. Adams, S.J. Smith & T. M. Murphy. (2017). A new record of domesticated Little Barley (*Hordeum pusillum* Nutt.) in Colorado: Travel, trade, or independent domestication. *The Kiva* 83(4) 414-442, DOI: 10.1080/00231940.2017.1376261

Griffith, M. P. (2004). The origins of an important cactus crop, *Opuntia ficus-indic*a (Cactaceae): new molecular evidence. Am. J. Bota. 91, 1915–1921.doi: 10.3732/ajb.91.11.1915

Hernández-Sandoval, L. E., González-Romo, C. E., and González-Medrano, F. (1991). Plantas Utiles de Tamaulipas. Ann. Inst. Biol. Serie Botan. 62, 1–38.

Hodgson, W. (2012). “Pre-Colombian agaves: living plants linking an ancient past in Arizona”, in Explorations in Ethnobiology: The Legacy of Amadeo Rea, edited by Quinlan M, Lepofsky D. Denton, TX: Society for Ethnobiology. p. 78–103.

Hodgson, W., and Salywon, A. M. (2013). Two new *Agave* species (Agavaceae) from central Arizona and their putative pre-Columbian domesticated origins. Brittonia. 65, 5–15. doi: 10.1007/s12228-012-9255-z

Hodgson, W. C., Salywon, A. M., and Doelle, W. H. (2018). Hohokam lost crop found: A new *Agave* (Agavaceae) species only known from large-scale pre-Columbian agricultural fields in Southern Arizona. System. Bota. 43, 734–740. doi: 10.1600/036364418X697445

Solís-Montero, L., Aceves-Chong, L., Vega-Polanco, M., & Vargas-Ponce, O. (2021). Changes in reproductive traits in *Physalis philadelphica*; an unexpected shift toward self-incompatibility in a domesticated annual fruit crop. *Frontiers in Plant Science*, *12*, 834.

Louderback, L. and B. Pavlik. (2017). Starch granule evidence for the earliest potato use in North America. Proceedings of the National Academy of Sciences. 114. 201705540. 10.1073/pnas.1705540114.

Yensen, N.P. 2008. Halophyte uses for the twenty-first century. In: M. A. Khan and D. J. Weber. (eds), Ecophysiology of High Salinity Tolerant Plants. Tasks for Vegetation Science, vol 40. Springer, Dordrecht. <https://doi.org/10.1007/1-4020-4018-0_23>
